# The Metabolic Syndrome and 11-Year Risk of Incident Cardiovascular Disease in the Atherosclerosis Risk in Communities Study

ANN MARIE McNEILL, PhD<sup>1</sup>  
WAYNE D. ROSAMOND, PhD<sup>1</sup>  
CYNTHIA J. GIRMAN, DRPH<sup>2</sup>  
SHERITA HILL GOLDEN, MD, MHS<sup>3</sup>

MARIA I. SCHMIDT, MD<sup>4</sup>  
HONEY E. EAST, MD<sup>5</sup>  
CHRISTIE M. BALLANTYNE, MD<sup>6</sup>  
GERARDO HEISS, MD, PHD<sup>1</sup>

**OBJECTIVE** — To assess the magnitude of the association between the National Cholesterol Education Program's Third Adult Treatment Panel Report (ATP III) definition of the metabolic syndrome and cardiovascular disease (CVD).

**RESEARCH DESIGN AND METHODS** — Cox regression was used to estimate the relative risk of incident coronary heart disease (CHD) and stroke among 12,089 black and white middle-aged individuals in the Atherosclerosis Risk in Communities (ARIC) study.

**RESULTS** — The metabolic syndrome was present in ~23% of individuals without diabetes or prevalent CVD at baseline. Over an average of 11 years of follow-up, 879 incident CHD and 216 ischemic stroke events occurred. Among the components of the metabolic syndrome, elevated blood pressure and low levels of HDL cholesterol exhibited the strongest associations with CHD. Men and women with the metabolic syndrome were ~1.5 and 2 times more likely to develop CHD than control subjects after adjustment for age, smoking, LDL cholesterol, and race/ARIC center (sex interaction  $P < 0.03$ ). Similar associations were found between the metabolic syndrome and incident ischemic stroke. Comparison of receiver operating characteristic curves indicated that the metabolic syndrome did not materially improve CHD risk prediction beyond the level achieved by the Framingham Risk Score (FRS).

**CONCLUSIONS** — Individuals without diabetes or CVD, but with the metabolic syndrome, were at increased risk for long-term cardiovascular outcomes, although statistical models suggested that most of that risk was accounted for by the FRS. Nevertheless, identification of individuals with the metabolic syndrome may provide opportunities to intervene earlier in the development of shared disease pathways that predispose individuals to both CVD and diabetes.

*Diabetes Care* 28:385–390, 2005

From the <sup>1</sup>Department of Epidemiology, University of North Carolina at Chapel Hill, Chapel Hill, North Carolina; the <sup>2</sup>Department of Epidemiology, Merck Research Laboratories, Rahway, New Jersey; the <sup>3</sup>Department of Medicine, Johns Hopkins University School of Medicine and Department of Epidemiology, Johns Hopkins University Bloomberg School of Public Health, Baltimore, Maryland; the <sup>4</sup>Graduate Studies Program in Epidemiology, Federal University of Rio Grande do Sul, Porto Alegre, Brazil; the <sup>5</sup>Department of Medicine, University of Mississippi Medical Center, Jackson, Mississippi; and the <sup>6</sup>Methodist DeBakey Heart Center and Department of Medicine, Baylor College of Medicine, Houston, Texas.

Address correspondence and reprint requests to Dr. Wayne Rosamond, University of North Carolina, Chapel Hill, 137 E. Franklin St, Chapel Hill, NC 28514. E-mail: wayne\_rosamond@unc.edu.

Received for publication 3 August 2004 and accepted in revised form 1 November 2004.

A.M.M. is employed by and holds stock in GlaxoSmithKline. C.J.G. holds stock in Pfizer.

**Abbreviations:** ARIC, Atherosclerosis Risk in Communities; ATP III, Third Adult Treatment Panel Report; CHD, coronary heart disease; CVD, cardiovascular disease; FRS, Framingham Risk Score; ROC, receiver operating characteristic.

A table elsewhere in this issue shows conventional and Système International units and conversion factors for many substances.

© 2005 by the American Diabetes Association.

The costs of publication of this article were defrayed in part by the payment of page charges. This article must therefore be hereby marked "advertisement" in accordance with 18 U.S.C. Section 1734 solely to indicate this fact.

The metabolic syndrome has been identified as a constellation of metabolic and nonmetabolic disorders related to defects in insulin sensitivity that lead to a high risk for the development of type 2 diabetes and cardiovascular disease (CVD) (1–5). A number of prospective analyses (4,6–12) have applied definitions from the National Cholesterol Education Program's Third Adult Treatment Panel Report (ATP III) (13) or the World Health Organization (14) and reported that the metabolic syndrome is associated with an approximate twofold increase in CVD. However, the generalizability of these findings to U.S. populations may be limited because several prior investigations included study populations comprised exclusively of white men or individuals with a family history of type 2 diabetes or did not report nonfatal CVD outcomes (4,6,10,12). The objective of the current study was to assess the association between the ATP III–defined metabolic syndrome and CVD mortality/morbidity among participants in the Atherosclerosis Risk in Communities (ARIC) study, a biracial cohort of white and black men and women.

## RESEARCH DESIGN AND METHODS

Between 1987 and 1989, ARIC examined population-based samples of 15,792 residents aged 45–64 years in four U.S. communities in North Carolina, Mississippi, Minnesota, and Maryland (15). The study was reviewed by institutional review boards at the clinical sites, and informed consent was obtained from all participants. The study population for these analyses included all cohort members who did not meet the following exclusions: race other than black or white ( $n = 48$ ); black participants residing in Minnesota or Maryland sites ( $n = 55$ ); failure to fast at least 8 h before venipuncture ( $n = 587$ ); missing data on metabolic syndrome components ( $n = 299$ ); prevalent/missing data on cor-



Table 1—Baseline characteristics of ARIC participants free of CVD and diabetes (1987–1989), stratified by sex and race

| Characteristic                            | Women      |            |            | Men        |            |            |
|-------------------------------------------|------------|------------|------------|------------|------------|------------|
|                                           | Black      | White      | All        | Black      | White      | All        |
| n                                         | 1,764      | 5,132      | 6,881      | 1,084      | 4,124      | 5,208      |
| Age (years)                               | 53 ± 5.7   | 54 ± 5.7   | 54 ± 5.7   | 54 ± 5.9   | 54 ± 5.7   | 54 ± 5.7   |
| Smoking*                                  |            |            |            |            |            |            |
| Current                                   | 24.6%      | 24.8%      | 24.7%      | 37.8%      | 23.8%      | 26.7%      |
| Former                                    | 17.3%      | 24.7%      | 22.8%      | 33.4%      | 46.4%      | 43.7%      |
| Never                                     | 58.0%      | 50.5%      | 52.4%      | 28.8%      | 29.8%      | 29.6%      |
| LDL cholesterol (mg/dl)                   | 135 ± 42.8 | 134 ± 39.2 | 135 ± 40.2 | 138 ± 42.3 | 139 ± 35.1 | 139 ± 36.7 |
| ATP III metabolic syndrome†               | 27.5%      | 22.5%      | 23.7%      | 17.8%      | 24.0%      | 22.7%      |
| Elevated blood pressure†                  | 61.1%      | 30.7%      | 38.5%      | 61.6%      | 34.2%      | 39.9%      |
| Low HDL cholesterol†                      | 30.7%      | 32.3%      | 31.9%      | 25.9%      | 42.9%      | 39.3%      |
| Elevated triglycerides†                   | 10.6%      | 23.3%      | 20.1%      | 16.5%      | 31.6%      | 28.4%      |
| Large waist circumference†                | 72.3%      | 54.1%      | 58.8%      | 24.9%      | 32.3%      | 30.8%      |
| Elevated fasting glucose† (110–125 mg/dl) | 13.7%      | 8.1%       | 9.6%       | 16.1%      | 15.9%      | 15.9%      |
| Impaired fasting glucose (100–125 mg/dl)  | 42.0%      | 32.9%      | 35.3%      | 46.0%      | 51.4%      | 50.3%      |
| Revised metabolic syndrome‡               | 40.0%      | 28.6%      | 31.4%      | 26.9%      | 33.4%      | 32.0%      |

Data are means ± SD for continuous variables or percent for dichotomous variables. \*Percentages may not sum to 100% due to rounding. †Criteria for each component of the metabolic syndrome are described in RESEARCH DESIGN AND METHODS. ‡Derived by applying the lower limit of IFG (100 mg/dl) to the elevated glucose component of the ATP III definition. To convert LDL cholesterol from mg/dl to mmol/l, multiply by 0.0259.

smoking (current, former, or never), individuals with the metabolic syndrome remained at significantly increased risk of CHD (sex interaction  $P < 0.03$ ) (Table 2). Further adjustment for physical activity, education, income, use of alcohol, and family history of CHD resulted in minimal change in the HRs associated with the metabolic syndrome (results not shown). Similar associations were found between the metabolic syndrome and incident stroke, but the relatively smaller number of events decreased the precision of these estimates.

Applying the lower threshold for impaired fasting glucose (100 mg/dl) to the metabolic syndrome definition increased the overall prevalence from ~23–32% (Table 1), but adjusted HRs for CHD and stroke were similar to those produced

when applying the original ATP III definition. After adjustment for age, race/center, LDL cholesterol, and smoking, HRs of CHD were 2.11 (95% CI 1.64–2.72) among women and 1.39 (1.18–1.63) among men. Adjusted HRs of ischemic stroke were 1.90 (1.25–2.89) and 1.52 (1.05–2.18), respectively.

As shown in Fig. 1, the risk of CHD in the study population increased monotonically with increasing number of metabolic syndrome components in men and women. Within each combination (one, two, three, or four or more), the HR of CHD was larger in women than men. Compared with ARIC participants with no components of the metabolic syndrome, adjusted HRs for those with one and four or more components ranged from 1.63 (95% CI 0.97–2.72) to 5.25

(3.10–8.89) in women and from 1.34 (1.04–1.72) to 2.23 (1.64–3.04) in men.

In Cox models containing the individual components, elevated blood pressure and low HDL cholesterol were significantly associated with CHD risk after adjustment for age, race/center, LDL cholesterol, and smoking (Table 3). In separate, multivariate-adjusted models that also included an indicator for the presence of the metabolic syndrome, the incremental HR for the metabolic syndrome was close to the null value and was not statistically significant [men: HR 0.91 (95% CI 0.67–1.23); women: HR 0.71 (0.45–1.14)], indicating that the risk of CHD associated with the syndrome was not in excess of the level explained by the presence of its individual components.

Predicted 10-year risk of CHD based

Table 2—Absolute and relative risks of cardiovascular events associated with the presence of the metabolic syndrome

| Outcome         | Crude incidence rate*  |                       | Crude incidence rate difference (95% CI) | HR (95% CI)      |                  |
|-----------------|------------------------|-----------------------|------------------------------------------|------------------|------------------|
|                 | Metabolic syndrome     | No metabolic syndrome |                                          | Crude            | Adjusted†        |
| CHD             |                        |                       |                                          |                  |                  |
| Women           | 57.5 [113 per 19,646]  | 22.7 [146 per 64,450] | 34.9 (23.6–46.1)                         | 2.55 (2.00–3.27) | 2.05 (1.59–2.64) |
| Men             | 138.4 [187 per 13,510] | 92.3 [433 per 46,911] | 46.1 (24.5–67.8)                         | 1.51 (1.27–1.79) | 1.46 (1.23–1.74) |
| Ischemic stroke |                        |                       |                                          |                  |                  |
| Women           | 19.0 [38 per 20,015]   | 8.5 [55 per 64,897]   | 10.5 (4.07–16.9)                         | 2.25 (1.49–3.41) | 1.96 (1.28–3.00) |
| Men             | 24.6 [35 per 14,258]   | 18.1 [88 per 48,621]  | 6.5 (–2.5 to 15.4)                       | 1.36 (0.92–2.01) | 1.42 (0.96–2.11) |

Data in brackets are numbers of events and person-years at risk. \*Incidence rate per 10,000 person-years. †Adjusted for age, race/ARIC center, LDL cholesterol, and smoking.

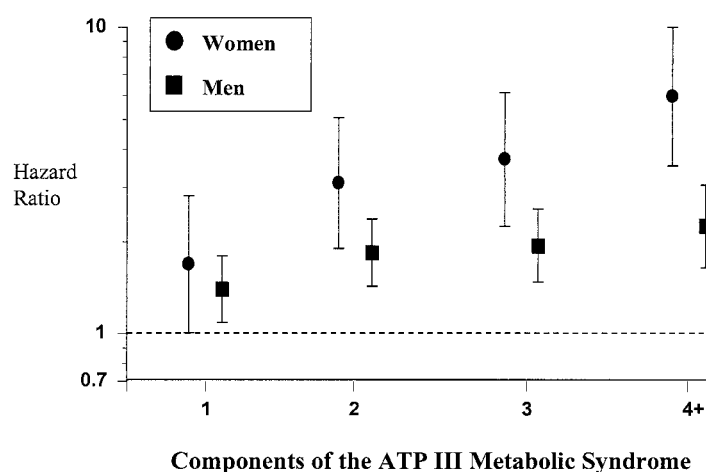

**Figure 1**—HRs of CHD associated with the presence of one, two, three, or four or more components of the metabolic syndrome compared with no components, adjusted for age, race/ARIC center, LDL cholesterol level, and smoking.

on the FRS algorithm was consistent with that expected from a middle-aged population initially free of diabetes, CHD, and stroke. A total of 98% of women and 53% of men had an FRS <10%. Incidence rates of CHD per 10,000 person-years were greater among those with the metabolic syndrome compared with those without in both the FRS <10% strata [women: 52.5 vs. 21.8 (difference 30.7, 95% CI 19.6–41.8); men: 90.3 vs. 65.4 (24.9, –3.6 to 53.5)] and FRS ≥10% strata [not estimable in women; men: 164.6 vs. 133.8 (30.8, 0.0–62.5)]. However, comparison of ROC curves indicated that the metabolic syndrome did not materially improve CHD risk prediction beyond the level achieved by the FRS among women (0.729 vs. 0.731) or men (0.631 vs. 0.634).

**CONCLUSIONS**— Although a recent study (8) of Native Americans found no association between the metabolic syndrome and incident CVD after adjustment for established risk factors, most published studies (4,6,7,9–12) that have applied consensus-based definitions of the metabolic syndrome have found that individuals with the syndrome are approximately two times more likely to develop CVD than individuals without the syndrome. However, limitations of several of these investigations included study populations composed exclusively of white men or individuals with a family history of type 2 diabetes or study designs that lacked CVD morbidity data (4,6,10,12).

In the current study, we found that among a population free of prevalent CHD, stroke, and diabetes, men and women with the metabolic syndrome were ~1.5 and 2 times more likely to develop CHD after adjustment for established risk factors. The relative risk of CVD mortality associated with diabetes is greater in women than in men, and the presence of diabetes has been shown to erase the “gender gap” in CVD incidence rates between men and women (24). In a recent analysis of data from the San Antonio Heart Study, Hunt et al. (11) reported that the association between the metabolic syndrome and CVD mortality was more than twice as large in women than men in the San Antonio Heart Study population, which included individuals with prevalent diabetes and CVD, but found no sex modification in the primary prevention population, i.e., those without prevalent diabetes or CVD. The authors suggest that one possible explanation for the sex modification observed in the general population is the stronger diabetes-CVD association in women. However, our

analysis indicates that the significantly greater risk of CHD associated with the metabolic syndrome in women is present among individuals without prevalent diabetes or CVD. Furthermore, in univariate and multivariate-adjusted models, the elevated fasting glucose component was not significantly associated with CHD. Therefore, in our study, it is unlikely that the sex interaction we observed is due to hyperglycemia alone.

Although we found a positive association between increasing number of ATP III metabolic syndrome components and CHD risk, results from our analysis indicate that the individual components for elevated blood pressure and low HDL cholesterol have the strongest effects on CHD risk. Using data from the ARIC study, Golden et al. (25) assessed the association between groupings of variables related to the metabolic syndrome and intimal-medial wall thickness of the carotid arteries as a measure of generalized atherosclerosis. They found that several combinations of risk factors associated with the metabolic syndrome conferred excess additive risk beyond the level predicted by the individual components. Conversely, in our analysis, multivariate proportional hazards modeling of all five components plus an indicator for the metabolic syndrome did not detect excess CHD associated with the presence of the syndrome. These results are consistent with a cross-sectional analysis by Alexander et al. (26), who reported that although elevated blood pressure, low HDL cholesterol, and diabetes were significantly associated with prevalent CHD, they found no indication of excess risk for the ATP III–defined metabolic syndrome once the individual components had been accounted for in multiplicative risk models.

Although the ATP III report recommends screening for the metabolic syndrome, specific recommendations for therapeutic lifestyle change and/or phar-

**Table 3**—Adjusted\* HRs and 95% CIs of CHD for each component of the metabolic syndrome

|                           | Women (n = 6,881) | Men (n = 5,208)  |
|---------------------------|-------------------|------------------|
| Elevated blood pressure   | 2.89 (2.18–3.80)  | 1.55 (1.32–1.83) |
| Low HDL cholesterol       | 1.70 (1.30–2.22)  | 1.59 (1.34–1.88) |
| High triglycerides        | 1.22 (0.84–1.50)  | 1.00 (0.84–1.19) |
| Elevated fasting glucose  | 0.99 (0.69–1.42)  | 1.13 (0.91–1.39) |
| Large waist circumference | 1.05 (0.79–1.39)  | 0.93 (0.78–1.11) |

Data are means ± SD. \*Adjusted for age, race/ARIC center, LDL cholesterol, and smoking.



macologic therapy are based on the number of CHD risk factors present at the time of screening and category of 10-year risk of CHD estimated by the FRS algorithm (<10%, 10–20%, and >20%). In the present analysis, inclusion of the metabolic syndrome did not add to CHD prediction models that included the FRS. However, as outlined in the ATP III report (13), the FRS was developed to identify individuals primarily for short-term risk reduction ( $\leq 10$  years), whereas identification of individuals with metabolic syndrome is aimed at long-term risk reduction primarily through lifestyle modification.

Nevertheless, patients falling in the category of <20% CHD risk who met the criteria for the metabolic syndrome had a higher absolute rate of CHD than those without the syndrome. These findings are similar to those reported by Girman et al. (27), who categorized individuals from two large lipid-lowering clinical trials by FRSs of either >20 or  $\leq 20\%$  and found that individuals with the ATP III metabolic syndrome had a higher risk of major coronary events than comparison subjects within FRS categories. In a joint analysis of the Framingham Offspring and San Antonio Heart Studies (28), those with the metabolic syndrome had a greater average FRS than those without, regardless of ethnicity. Taken together, these findings indicate that individuals within the same FRS category who have the metabolic syndrome are at increased risk of CHD relative to subjects without the syndrome. This suggests that identification of metabolic syndrome may have prognostic value to medical practitioners for patients in both the upper (>20%) and lower ( $\leq 20\%$ ) FRS categories.

The present investigation has several strengths. The ARIC study is one of the largest and longest followed biracial samples of U.S. adults with validated CHD and stroke outcomes and standardized collection of covariate information. However, several limitations of the data should be kept in mind. The ARIC cohort was selected from four U.S. communities but is not representative of the U.S. in general. Because the prevalence of the metabolic syndrome can vary widely by demographic characteristics of study participants (29), caution should be used in extrapolating these results to other populations. Participants excluded due to missing information (7.7%) were more

likely to be black and hypertensive but otherwise were similar to the analysis population. Sensitivity analyses performed by varying the proportion of these individuals classified as having CHD or metabolic syndrome at baseline and refitting Cox models resulted in negligible changes from reported HRs.

Finally, in Cox models that included all five components of the metabolic syndrome, elevated blood pressure, and low HDL cholesterol, but not elevated triglycerides, had statistically significant associations with CHD. Although it is not uncommon to include both HDL cholesterol and triglycerides as independent variables in CHD prediction models, such inclusion can result in biased estimates of effects because of the generally strong correlation between the two lipid measures and the relatively greater intraindividual variability of fasting triglycerides (30). Under such conditions, HDL cholesterol may be more likely to show an independent association with CHD as a function of its measurement qualities, rather than through any more direct causal link with CHD. A previously published assessment (31) of the reliability of fasting-state lipoprotein measurements in ARIC indicated that the reliability coefficient was higher for HDL cholesterol than triglycerides (0.94 vs. 0.85, respectively). As such, we cannot rule out this phenomenon in our results.

According to the American Diabetes Association (32), CVD is the cause of death in as many as 75–80% of individuals with diabetes. The “common soil” (33) hypothesis posits that diabetes is not a direct cause of CVD but rather one of several atherosclerotic sequelae arising from shared precursors. The metabolic syndrome may be a clinically recognizable and, in many cases, an early manifestation of such shared antecedents that increase the risk of diabetes and CVD among individuals. Identifying individuals with the metabolic syndrome and investigating effective treatment options may provide opportunities for intervention early in the disease pathways of both diseases. However, additional research is needed to refine the metabolic syndrome definition and to determine whether treatment of underlying conditions such as insulin resistance results in improved CHD prevention for patients with the metabolic syndrome beyond the level achieved by

interventions currently targeted at its specific components.

**Acknowledgments**— This research was funded by National Institutes of Health Contracts N01-HC-55015, N01-HC-55016, N01-HC-55018, N01-HC-55019, N01-HC-55020, N01-HC-55021, and N01-HC-55022. A.M.M. received an NHLBI Research Service Award grant from the Cardiovascular Disease Epidemiology Training Program (5-T32-HL-07055) at the University of North Carolina at Chapel Hill, Chapel Hill, North Carolina.

We thank the staff and participants of the ARIC study for their important contributions.

## References

1. Reaven G: Insulin resistance, compensatory hyperinsulinemia and coronary heart disease: syndrome X revisited. In *Handbook of Physiology: The Endocrine Pancreas and Regulation of Metabolism*. Sect. 7, vol. 2 Jefferson LS, Cherrington AD, Eds. New York, Oxford University Press, 2001
2. Haffner SM, Valdez RA, Hazuda HP, Mitchell BD, Morales PA, Stern MP: Prospective analysis of the insulin-resistance syndrome (syndrome X). *Diabetes* 41: 715–722, 1992
3. Laaksonen DE, Lakka HM, Niskanen LK, Kaplan GA, Salonen JT, Lakka TA: Metabolic syndrome and development of diabetes mellitus: application and validation of recently suggested definitions of the metabolic syndrome in a prospective cohort study. *Am J Epidemiol* 156:1070–1077, 2002
4. Lakka HM, Laaksonen DE, Lakka TA, Niskanen LK, Kumpusalo E, Tuomilehto J, Salonen JT: The metabolic syndrome and total and cardiovascular disease mortality in middle-aged men. *JAMA* 288:2709–2716, 2002
5. Lorenzo C, Okoloise M, Williams K, Stern MP, Haffner SM: The metabolic syndrome as predictor of type 2 diabetes: the San Antonio heart study. *Diabetes Care* 26: 3153–3159, 2003
6. Isomaa B, Almgren P, Tuomi T, Forsen B, Lahti K, Nissen M, Taskinen MR, Groop L: Cardiovascular morbidity and mortality associated with the metabolic syndrome. *Diabetes Care* 24:683–689, 2001
7. Bonora E, Kiechl S, Willeit J, Oberhollenzer F, Egger G, Bonadonna RC, Muggeo M: Carotid atherosclerosis and coronary heart disease in the metabolic syndrome: prospective data from the Bruneck study. *Diabetes Care* 26:1251–1257, 2003
8. Resnick HE, Jones K, Ruotolo G, Jain AK, Henderson J, Lu W, Howard BV: Insulin resistance, the metabolic syndrome, and risk of incident cardiovascular disease in nondiabetic American Indians: the strong

- heart study. *Diabetes Care* 26:861–867, 2003
9. Rutter MK, Meigs JB, Sullivan LM, D'Agostino RB Sr, Wilson PW: C-reactive protein, the metabolic syndrome, and prediction of cardiovascular events in the Framingham Offspring Study. *Circulation* 110:380–385, 2004
10. Malik S, Wong ND, Franklin SS, Kamath TV, L'Italien GJ, Pio JR, Williams GR: Impact of the metabolic syndrome on mortality from coronary heart disease, cardiovascular disease, and all causes in United States adults. *Circulation* 110:1245–1250, 2004
11. Hunt KJ, Resendez RG, Williams K, Haffner SM, Stern MP: National Cholesterol Education Program versus World Health Organization metabolic syndrome in relation to all-cause and cardiovascular mortality in the San Antonio Heart Study. *Circulation* 110:1251–1257, 2004
12. Ford ES: The metabolic syndrome and mortality from cardiovascular disease and all-causes: findings from the National Health and Nutrition Examination Survey II Mortality Study. *Atherosclerosis* 173:309–314, 2004
13. Expert Panel on Detection, Evaluation, and Treatment of High Blood Cholesterol in Adults: Executive Summary of the Third Report of the National Cholesterol Education Program (NCEP) Expert Panel on Detection, Evaluation, and Treatment of High Blood Cholesterol in Adults (Adult Treatment Panel III). *JAMA* 285:2486–2497, 2001
14. World Health Organization: *Definition, Diagnosis and Classification of Diabetes Mellitus and its Complications. Report of a WHO Consultation. Part 1: Diagnosis and Classification of Diabetes Mellitus*. Geneva, World Health Org., 1999 (WHO/NCD/NCS99.2)
15. ARIC Investigators: The Atherosclerosis Risk in Communities (ARIC) Study: design and objectives. *Am J Epidemiol* 129:687–702, 1989
16. Sharrett AR, Ballantyne CM, Coady SA, Heiss G, Sorlie PD, Catellier D, Patsch W: Coronary heart disease prediction from lipoprotein cholesterol levels, triglycerides, lipoprotein(a), apolipoproteins a-i and b, and HDL density subfractions: the atherosclerosis risk in communities (ARIC) study. *Circulation* 104:1108–1113, 2001
17. Folsom AR, Szklo M, Stevens J, Liao F, Smith R, Eckfeldt JH: A prospective study of coronary heart disease in relation to fasting insulin, glucose, and diabetes: the Atherosclerosis Risk in Communities (ARIC) study. *Diabetes Care* 20:935–942, 1997
18. Friedewald WT, Levy RI, Fredrickson DS: Estimation of the concentration of low-density lipoprotein cholesterol in plasma, without use of the preparative ultracentrifuge. *Clin Chem* 18:499–502, 1972
19. The Expert Committee on the Diagnosis and Classification of Diabetes Mellitus: Report of the Expert Committee on the Diagnosis and Classification of Diabetes Mellitus. *Diabetes Care* 26 (Suppl. 1):S5–S20, 2003
20. White AD, Folsom AR, Chambless LE, Sharret AR, Yang K, Conwill D, Higgins M, Williams OD, Tyroler HA: Community surveillance of coronary heart disease in the Atherosclerosis Risk in Communities (ARIC) Study: methods and initial two years' experience. *J Clin Epidemiol* 49:223–233, 1996
21. Rosamond WD, Folsom AR, Chambless LE, Wang CH, McGovern PG, Howard G, Copper LS, Shahar E: Stroke incidence and survival among middle-aged adults: 9-year follow-up of the Atherosclerosis Risk in Communities (ARIC) cohort. *Stroke* 30:736–743, 1999
22. National Institute of Neurological and Communicative Disorders and Stroke: The National Survey of Stroke. *Stroke* 12:11–191, 1981
23. Schoenfeld D: Partial residuals for the proportional hazards model. *Biometrika* 69:51–55, 1982
24. Barrett-Connor E, Giardina EG, Gitt AK, Gudat U, Steinberg HO, Tschoepe D: Women and heart disease: the role of diabetes and hyperglycemia. *Arch Intern Med* 164:934–942, 2004
25. Golden SH, Folsom AR, Coresh J, Sharrett AR, Szklo M, Brancati F: Risk factor groupings related to insulin resistance and their synergistic effects on subclinical atherosclerosis: the Atherosclerosis Risk in Communities study. *Diabetes* 51:3069–3076, 2002
26. Alexander CM, Landsman PB, Teutsch SM, Haffner SM: NCEP-defined metabolic syndrome, diabetes, and prevalence of coronary heart disease among NHANES III participants age 50 years and older. *Diabetes* 52:1210–1214, 2003
27. Gorman CJ, Rhodes T, Mercuri M, Pyorala K, Kjekshus J, Pedersen TR, Beere PA, Gotto AM, Clearfield M: The metabolic syndrome and risk of major coronary events in the Scandinavian Simvastatin Survival Study (4S) and the Air Force/Texas Coronary Atherosclerosis Prevention Study (AFCAPS/TexCAPS). *Am J Cardiol* 93:136–141, 2004
28. Meigs JB, Wilson PW, Nathan DM, D'Agostino RB Sr, Williams K, Haffner SM: Prevalence and characteristics of the metabolic syndrome in the San Antonio Heart and Framingham Offspring Studies. *Diabetes* 52:2160–2167, 2003
29. Ford ES, Giles WH, Dietz WH: Prevalence of the metabolic syndrome among U.S. adults: findings from the third National Health and Nutrition Examination Survey. *JAMA* 287:356–359, 2002
30. Egger M, Smith GD, Pfluger D, Altpeter E, Elwood PC: Triglyceride as a risk factor for ischaemic heart disease in British men: effect of adjusting for measurement error. *Atherosclerosis* 143:275–284, 1999
31. Chambless LE, McMahon RP, Brown SA, Patsch W, Heiss G, Shen YL: Short-term intraindividual variability in lipoprotein measurements: the Atherosclerosis Risk in Communities (ARIC) study. *Am J Epidemiol* 136:1069–1081, 1992
32. American Diabetes Association: Detection and management of lipid disorders in diabetes. *Diabetes Care* 16:828–834, 1993
33. Stern MP: Diabetes and cardiovascular disease: the "common soil" hypothesis. *Diabetes* 44:369–374, 1995
